# Supplementary material for: Open thoracic surgical implantation of cardiac pacemakers in rats
Source: Springer Nature journal article supplement (doi:10.1038/s41596-022-00770-y), 2022-11-21
Supplement: MOESM1 [file 41596_2022_770_MOESM1_ESM18.pdf]

---

## Supplementary information

---

# Open thoracic surgical implantation of cardiac pacemakers in rats

---

In the format provided by the  
authors and unedited

a  
Mortality rate of surgeries performed  
2017-2020

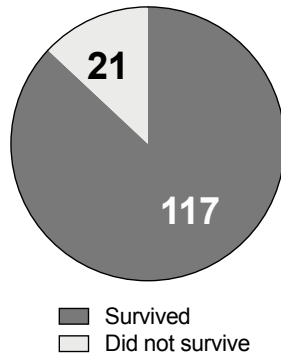

b  
Mortality Rate Relating To Surgeon Experience

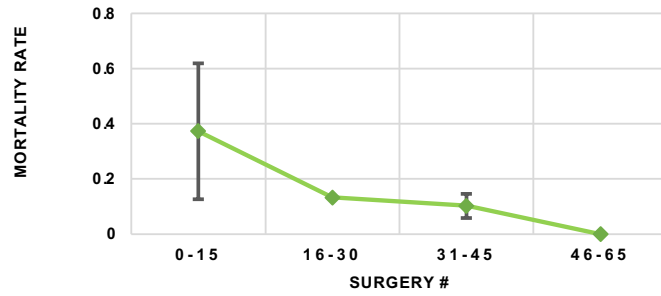

**Supplementary Figure 1: Mortality rate of pacemaker implantation surgery.**

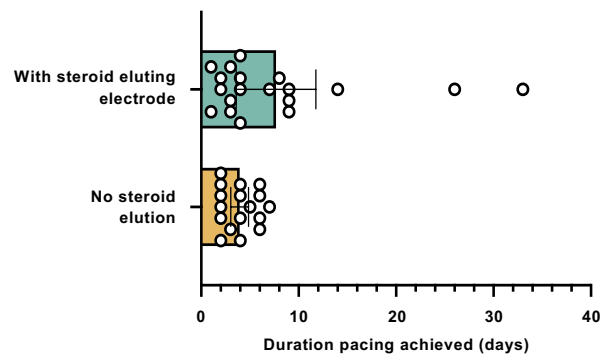

**Supplementary Figure 2:** Summary of functional lifetime of pacemakers implanted in rats.

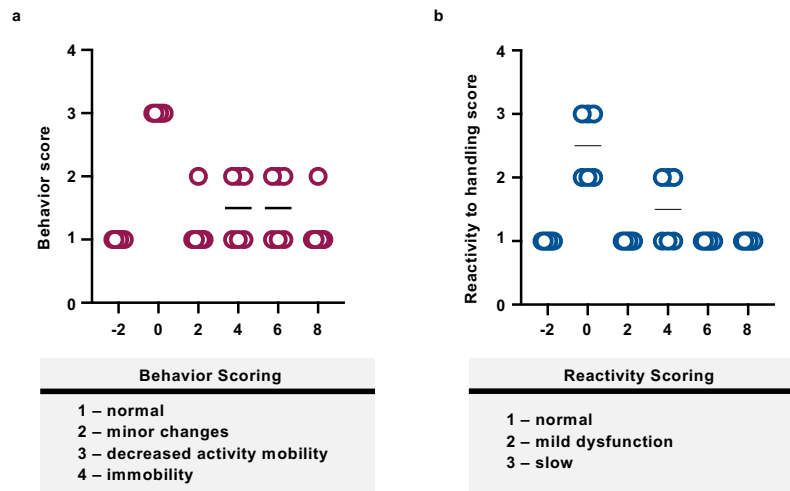

**Supplementary Figure 3:** Systemic effects following surgery.

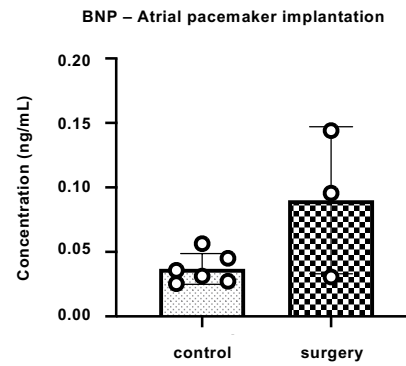

**Supplementary Figure 4:** Brain natriuretic peptide (BNP) 45 biomarker levels for right atrial pacemaker implantation.

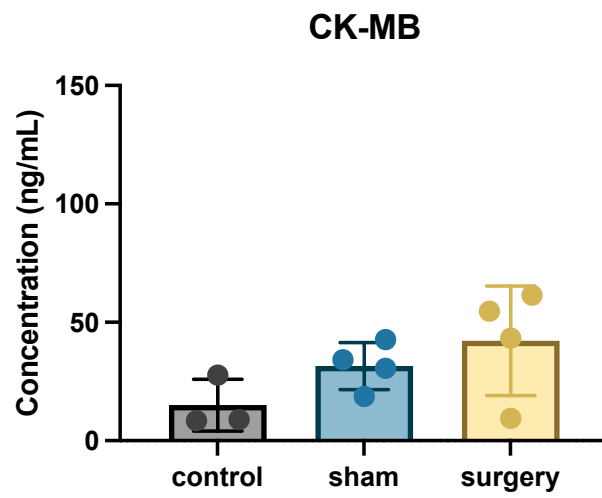

**Supplementary Figure 5:** Creatine kinase-MB (CK-MB) biomarker levels for ventricular implantation.

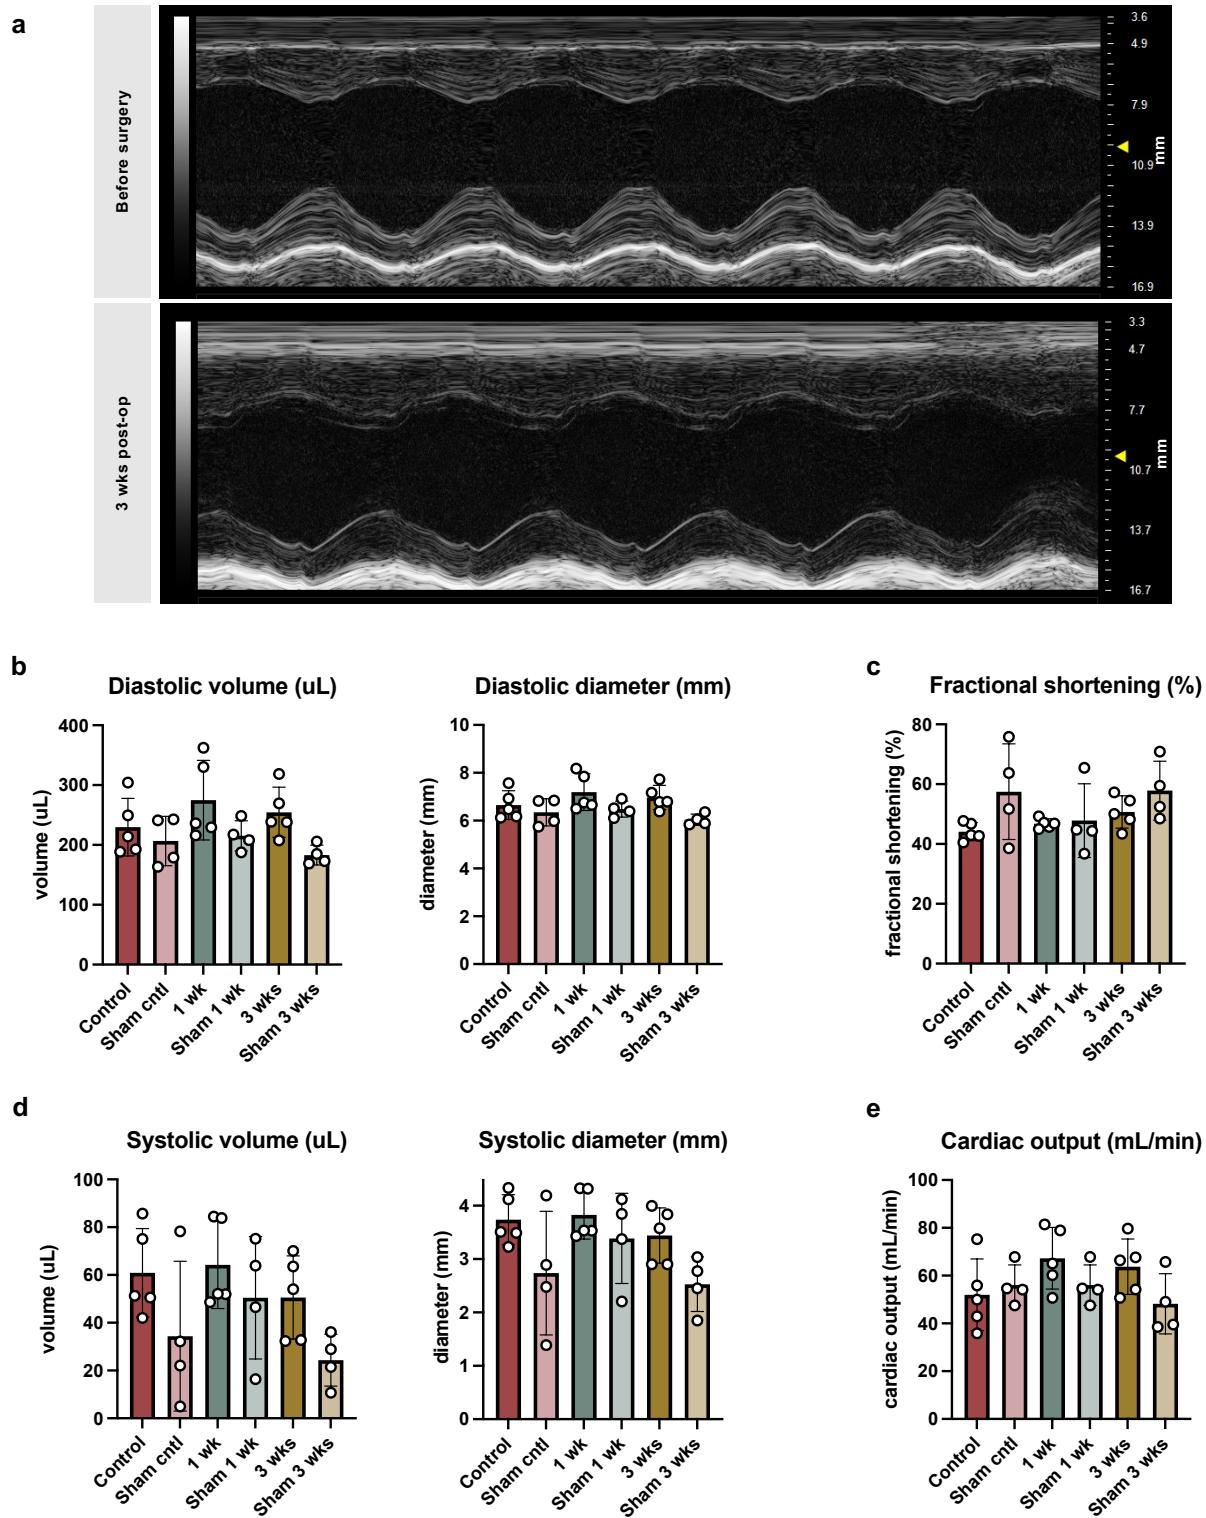

**Supplementary Figure 6:** Echocardiographic assessment of animals following pacemaker implantation.
