# Supplementary material for: Open thoracic surgical implantation of cardiac pacemakers in rats
Source: Springer Nature journal article supplement (doi:10.1038/s41596-022-00770-y), 2022-11-21
Supplement: MOESM3 [file 41596_2022_770_MOESM3_ESM20.xlsx]

## Sheet: Fig. S1-operator experience
	Surgery #
Surgeon	0-15	16-30	31-45	46-65
Operator 1	0.333333	0.133333	0.0714286
Operator 2	0.133333	0.133333	0.133333	0
Operator 3	0.4
Operator 4	0.625
	0-15	16-30	31-45	46-65
Average	0.372917	0.133333	0.102381	0
stdev	0.202687	0	0.0437733
