# Supplementary material for: Open thoracic surgical implantation of cardiac pacemakers in rats
Source: Springer Nature journal article supplement (doi:10.1038/s41596-022-00770-y), 2022-11-21
Supplement: MOESM4 [file 41596_2022_770_MOESM4_ESM21.xlsx]

## Sheet: Fig.S2-device functional lifeti
Date	Rat ID	Steroid elution?	Total days pacing
2019-06-11	Rat 1	no	5
2019-06-11	Rat 2	no	3
2019-06-11	Rat 3	no	2
2019-09-17	Rat 4	no	4
2019-09-17	Rat 6	no	6
2019-09-17	Rat 7	no	4
2019-09-17	Rat 9	no	4
2019-09-17	Rat 12	no	4
2019-10-15	Rat 5	no	2
2019-10-15	Rat 6	no	2
2019-10-15	Rat 7	no	2
2019-10-15	Rat 8	no	2
2019-10-15	Rat 9	no	7
2019-10-15	Rat 10	no	6
2019-10-15	Rat 11	no	2
2019-10-15	Rat 12	no	6
2019-10-15	Rat 13	no	6
2019-11-07	Rat 2	yes	26
2019-11-07	Rat 3	yes	4
2019-11-07	Rat 5	yes	8
2019-12-04	Rat 1	yes	4
2019-12-04	Rat 2	yes	4
2019-12-04	Rat 3	yes	1
2019-12-04	Rat 4	yes	1
2019-12-04	Rat 5	yes	4
2019-12-04	Rat 6	yes	2
2019-12-04	Rat 7	yes	3
2019-12-04	Rat 8	yes	3
2019-12-04	Rat 9	yes	9
2019-12-04	Rat 10	yes	7
2019-12-04	Rat 11	yes	2
2019-12-04	Rat 12	yes	3
2020-01-30	Rat 3	yes	9
2020-01-30	Rat 4	yes	33
2020-01-30	Rat 5	yes	9
2020-01-30	Rat 6	yes	14
