# Supplementary material for: Open thoracic surgical implantation of cardiac pacemakers in rats
Source: Springer Nature journal article supplement (doi:10.1038/s41596-022-00770-y), 2022-11-21
Supplement: MOESM5 [file 41596_2022_770_MOESM5_ESM22.xlsx]

## Sheet: Fig. S3-systemic assessment
Scale	Reactivity to handling	Appearance	Behavior
1	normal	normal	normal
2	mild dysfunction	ruffled fur	minor changes
3	slow	red at nose/eyes	decreased activity/mobility
4	--	abnormal posture	immobility
	Reactivity to handling
Post-op day	2020 03 04 rat 1	2020 03 04 rat 2	2020 03 04 rat 3	2020 03 04 rat 4	2020 03 04 rat 5	2020 03 04 rat 6	Assessed by
-2	1	1	1	1	1	1	HSK
0	3	2	2	2	3	3	HSK
2	1	1	1	1	1	1	HSK
4	1	1	1	2	2	2	HSK
6	1	1	1	1	1	1	HSK
8	1	1	1	1	1	1	HSK
Average	1.33333	1.16667	1.16667	1.33333	1.5	1.5
	Behavior
Post-op day	2020 03 04 rat 1	2020 03 04 rat 2	2020 03 04 rat 3	2020 03 04 rat 4	2020 03 04 rat 5	2020 03 04 rat 6	Assessed by
-2	1	1	1	1	1	1	HSK
0	3	3	3	3	3	3	HSK
2	1	1	2	1	1	1	HSK
4	2	2	2	1	1	1	HSK
6	2	2	2	1	1	1	HSK
8	2	1	1	1	1	1	HSK
Average	1.83333	1.66667	1.83333	1.33333	1.33333	1.33333
	Appearance			2020 03 04 rat 3	532g
Post-op day	2020 03 04 rat 1	2020 03 04 rat 2	2020 03 04 rat 3	2020 03 04 rat 4	2020 03 04 rat 5	2020 03 04 rat 6	Assessed by
-2	1	1	1	1	1	1	HSK
0	4	2	4	4	4	3	HSK
2	4	4	4	2	3	2	HSK
4	4	4	4	4	4	4	HSK
6	4	3	4	2	2	2	HSK
8	3	2	2	1	1	1	HSK
Average	3.25	2.75	3.25	2.75	3	2.5
