# Supplementary material for: Open thoracic surgical implantation of cardiac pacemakers in rats
Source: Springer Nature journal article supplement (doi:10.1038/s41596-022-00770-y), 2022-11-21
Supplement: MOESM7 [file 41596_2022_770_MOESM7_ESM24.xlsx]

## Sheet: Fig. S5-CK-MB
	Avg conc (ng/mL)
Sham	34.2155
	30.5193
	42.6849
	18.6758
Device implanted	9.38589
	61.3876
	54.6531
	43.2508
Control	27.6386
	8.45601
	8.94369
