# Supplementary material for: Open thoracic surgical implantation of cardiac pacemakers in rats
Source: Springer Nature journal article supplement (doi:10.1038/s41596-022-00770-y), 2022-11-21
Supplement: MOESM8 [file 41596_2022_770_MOESM8_ESM25.xlsx]

## Sheet: Fig. S6 - echo
Time endpoint	Diameter (systolic)	Diameter (diastolic) (mm)	Volume (systolic) (uL)	Volume (diastolic)	Cardiac output (mL/min)	Fractional shortening (%)
Before surgery	3.51	6.472	51.296	214.051	55.889	46.77
	3.49	6.121	50.567	188.478	42.909	42.993
	4.335	7.565	85.697	304.293	75.258	42.696
Wk 1	3.53	6.5	51.925	216.047	50.712	45.695
	3.429	6.76	48.655	236.117	65.098	49.272
	3.536	6.655	52.138	229.436	60.224	46.871
Wk 3	2.901	6.383	32.743	207.798	54.218	54.544
	3.997	7.722	70.1	318.634	79.663	48.234
	3.575	7.162	54.024	269.342	67.663	50.083
